# Supplementary material
Source: publisher figshare collection journal article supplement (https://frontiersin.figshare.com/ndownloader/files/25788467)
Supplement: Supplementary file [file 25788467]

**Supplementary Table 1 – ATC codes and spectrum of antimicrobial activity for oral antibiotics included in this study**

| <b>Level 5 ATC code</b> | <b>ATC level 5 name</b>            | <b>Family</b>                   | <b>ECDC Classification <sup>23</sup></b> |
|-------------------------|------------------------------------|---------------------------------|------------------------------------------|
| J01CA04                 | Amoxicillin                        | Penicillin                      | Narrow                                   |
| J01CR02                 | Amoxicillin and enzyme inhibitor   | Penicillin                      | Broad                                    |
| J01CE10                 | Benzathine phenoxymethylpenicillin | Penicillin                      | Narrow                                   |
| J01CF05                 | Flucloxacillin                     | Penicillin                      | Narrow                                   |
| J01CE02                 | Phenoxymethylpenicillin            | Penicillin                      | Narrow                                   |
| J01CA08                 | Pivmecillinam                      | Penicillin                      | Narrow                                   |
| J01DC04                 | Cefaclor                           | Cephalosporin                   | Broad                                    |
| J01DB01                 | Cefalexin                          | Cephalosporin                   | Narrow                                   |
| J01DD13                 | Cefpodoxime                        | Cephalosporin                   | Broad                                    |
| J01DC02                 | Cefuroxime                         | Cephalosporin                   | Broad                                    |
| J01MA02                 | Ciprofloxacin                      | Fluoroquinolone                 | Broad                                    |
| J01MA06                 | Norfloxacin                        | Fluoroquinolone                 | Broad                                    |
| J01EE01                 | Sulfamethoxazole and trimethoprim  | Trimethoprim and co-trimoxazole | Other                                    |
| J01EA01                 | Trimethoprim                       | Trimethoprim and co-trimoxazole | Other                                    |
| J01FA10                 | Azithromycin                       | Macrolide                       | Broad                                    |
| J01FA09                 | Clarithromycin                     | Macrolide                       | Broad                                    |
| J01FA01                 | Erythromycin                       | Macrolide                       | Narrow                                   |
| J01FA06                 | Roxithromycin                      | Macrolide                       | Broad                                    |
| J01AA02                 | Doxycycline                        | Tetracycline                    | Other                                    |
| J01AA04                 | Lymecycline                        | Tetracycline                    | Other                                    |
| J01AA07                 | Tetracycline                       | Tetracycline                    | Other                                    |
| J01FF01                 | Clindamycin                        | Other                           | Broad                                    |
| J01XD01                 | Metronidazole                      | Other                           | Other                                    |
| J01XE01                 | Nitrofurantoin                     | Other                           | Other                                    |

## Supplementary methods

Penicillin skin testing was performed using either a three step or five step protocol with the choice of protocol determined by clinician preference. In the five step protocol, all steps below were performed. In the three step protocol, steps one and three were omitted. Positive skin testing results were adjudicated by the immunology clinician on the day of the testing based on a wheal size 3 mm greater than a saline control for SPT and an increase of wheal size of 3mm over the saline control (0.02 ml) for IDT.

| Step 1 Skin Prick Testing  |                               | Time incubation start: [ ] |       |            |            |
|----------------------------|-------------------------------|----------------------------|-------|------------|------------|
|                            | Drug                          | Conc.                      | Unit  | Wheal (mm) | Flare (mm) |
| 1                          | Negative Control (Saline)     | 0.9                        | %     |            |            |
| 2                          | Histamine Control             | 10                         | mg/mL |            |            |
| 3                          | Benzyl Penicillin             | 0.6                        | mg/mL |            |            |
| 4                          | Major Determinant (PPL)       | 0.004                      | mg/mL |            |            |
| 5                          | Minor Determinant (MD)        | 0.05                       | mg/mL |            |            |
| 6                          | Amoxycillin                   | 2                          | mg/mL |            |            |
| 7                          | Amoxycillin / Clavulanic acid | 2                          | mg/mL |            |            |
| 8                          | Flucloxacillin                | 1                          | mg/mL |            |            |
| Step 2 Skin Prick Testing  |                               | Time incubation start: [ ] |       |            |            |
| 9                          | Benzyl Penicillin             | 6                          | mg/mL |            |            |
| 10                         | Major Determinant (PPL)       | 0.04                       | mg/mL |            |            |
| 11                         | Minor Determinant (MD)        | 0.5                        | mg/mL |            |            |
| 12                         | Amoxycillin                   | 20                         | mg/mL |            |            |
| 13                         | Amoxycillin / Clavulanic acid | 20                         | mg/mL |            |            |
| 14                         | Flucloxacillin                | 10                         | mg/mL |            |            |
| Step 3 Intradermal Testing |                               | Time incubation start: [ ] |       |            |            |
| 15                         | Negative Control (Saline)     | 0.9                        | %     |            |            |
| 16                         | Benzyl Penicillin             | 0.06                       | mg/mL |            |            |
| 17                         | Major Determinant (PPL)       | 0.0004                     | mg/mL |            |            |
| 18                         | Minor Determinant (MD)        | 0.005                      | mg/mL |            |            |
| 19                         | Amoxycillin                   | 0.2                        | mg/mL |            |            |
| 20                         | Amoxycillin / Clavulanic acid | 0.2                        | mg/mL |            |            |
| 21                         | Flucloxacillin                | 0.1                        | mg/mL |            |            |
| Step 4 Intradermal Testing |                               | Time incubation start: [ ] |       |            |            |
| 22                         | Benzyl Penicillin             | 0.6                        | mg/mL |            |            |
| 23                         | Major Determinant (PPL)       | 0.004                      | mg/mL |            |            |
| 24                         | Minor Determinant (MD)        | 0.05                       | mg/mL |            |            |
| 25                         | Amoxycillin                   | 2                          | mg/mL |            |            |
| 26                         | Amoxycillin / Clavulanic acid | 2                          | mg/mL |            |            |
| 27                         | Flucloxacillin                | 1                          | mg/mL |            |            |
| Step 5 Intradermal Testing |                               | Time incubation start: [ ] |       |            |            |
| 28                         | Benzyl Penicillin             | 6                          | mg/mL |            |            |
| 29                         | Major Determinant (PPL)       | 0.04                       | mg/mL |            |            |
| 30                         | Minor Determinant (MD)        | 0.5                        | mg/mL |            |            |
| 31                         | Amoxycillin                   | 20                         | mg/mL |            |            |
| 32                         | Amoxycillin / Clavulanic acid | 20                         | mg/mL |            |            |
| 33                         | Flucloxacillin                | 10                         | mg/mL |            |            |
